# Supplementary material for: Hormonal axes in Drosophila: regulation of hormone release and multiplicity of actions
Source: PubMed Central journal article supplement (PMC7584566; doi:10.1007/s00441-020-03264-z), 2020-08-22
Supplement: 441_2020_3264_MOESM1_ESM.pdf [file 441_2020_3264_MOESM1_ESM.pdf]

**Supplementary Material Files**

**Hormonal axes in *Drosophila*: regulation of hormone release and multiplicity of actions**

Dick R.Nässel<sup>1</sup> and Meet Zandawala<sup>2</sup>

**Supplementary Table 1.** Neuropeptides detected by mass spectrometry of dissected glands in *Bombyx mori* and *Locusta migratoria*.

| Species                   | CC/CA Peptide              | Stage | Reference                  |
|---------------------------|----------------------------|-------|----------------------------|
| <i>Bombyx mori</i>        | AKH                        | Larva | (Liu et al., 2012)         |
|                           | AstA                       | Larva |                            |
|                           | AstC                       | Larva |                            |
|                           | Allatotropin               | Larva |                            |
|                           | BRFa <sup>1</sup>          | Larva |                            |
|                           | BMS                        | Larva |                            |
|                           | CAPA-PVK                   | Larva |                            |
|                           | CCAP                       | Larva |                            |
|                           | CRZ                        | Larva |                            |
|                           | NPLP1                      | Larva |                            |
|                           | Orcokinin                  | Larva |                            |
|                           | PTST (MIP) <sup>1</sup>    | Larva |                            |
|                           | SGNP (PRLa)                | Larva |                            |
|                           | sNPF <sup>1</sup>          | Larva |                            |
|                           | SK                         | Larva |                            |
|                           | TK <sup>1</sup>            | Larva |                            |
|                           |                            |       |                            |
| <i>Locusta migratoria</i> | PK1-7 <sup>2</sup>         | Adult | (Clynen and Schoofs, 2009) |
|                           | Lom-AG-MT-2 <sup>2</sup>   | Adult |                            |
|                           | FLRFa (MS) <sup>2</sup>    | Adult |                            |
|                           | sNPF <sup>2</sup>          | Adult |                            |
|                           | AstA4,5,9,10 <sup>2</sup>  | Adult |                            |
|                           | NPF <sup>3</sup>           | Adult |                            |
|                           | CRZ <sup>3</sup>           | Adult |                            |
|                           | LomHrTH (ACP) <sup>3</sup> | Adult |                            |
|                           | AKH I-III <sup>3</sup>     | Adult |                            |
|                           |                            |       |                            |
| <i>Carausius morosus</i>  | AKH                        | Adult | (Liessem et al., 2018)     |
|                           | CRZ                        | Adult |                            |
|                           | MIP7,9,11                  | Adult |                            |
|                           | PK1,7,9                    | Adult |                            |
|                           | MS                         | Adult |                            |
|                           | NPLP-1                     | Adult |                            |
|                           | sNPF                       | Adult |                            |
|                           | PKL1,2 <sup>4</sup>        | Adult |                            |
|                           | RFLa <sup>4</sup>          | Adult |                            |
| HanSolin <sup>4</sup>     | Adult                      |       |                            |

**Notes**

Peptide acronyms as in Table 1

<sup>1</sup> These peptides might act as release regulating factors (BRFa, *Bombyx* RFamide; PTST, AstB and MIP; others as in Table 1)

<sup>2</sup> In both CC and CA

<sup>3</sup> Only in CC

<sup>4</sup> Novel peptides, first detected in *C. morosus*

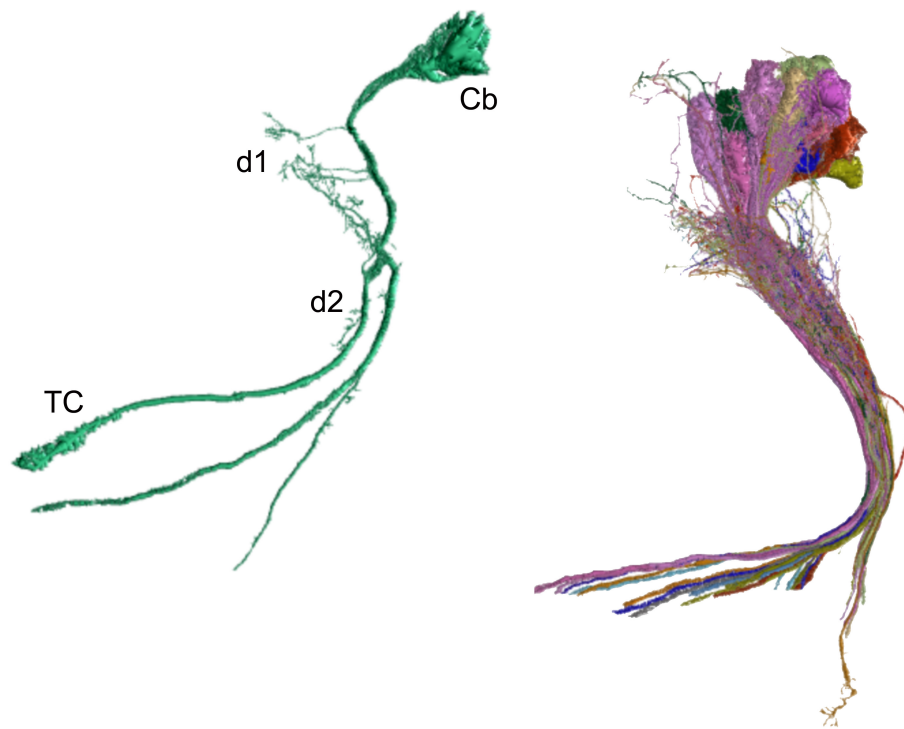

**S. Fig. 1.** Brain insulin producing cells (IPCs) reconstructed from serial electron microscopic sections of a *Drosophila* hemibrain. To the left side view of one IPC, to the right a cluster of IPCs in similar view. Cb, cell body; d1 and d2 two sets of presumed dendrites. This figure was compiled from data in neuPRINT (<https://neuprint.janelia.org>) (Clements et al., 2020; Xu et al., 2020; Zheng et al., 2018).

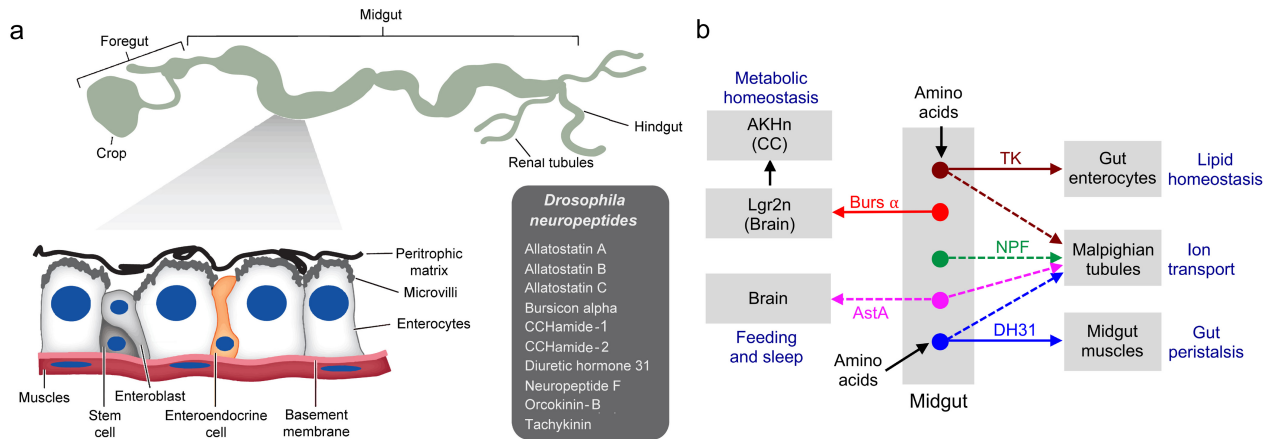

**S. Fig. 2. Neuropeptides in enteroendocrine cells (EECs) of the intestine.** **a.** A scheme depicting the organization of the digestive tract in adult *Drosophila*. The *Drosophila* gut spans across the entire thorax and abdomen and is comprised of the foregut, midgut, Malpighian (renal) tubules and hindgut. The lower part illustrates that the midgut is composed of five different cell types: muscle cells, stem cells, enteroblasts, enterocytes and enteroendocrine cells. Ten neuropeptides/peptide hormones expressed in the adult *Drosophila* enteroendocrine cells are listed in the box. This figure is from (Nässel and Zandawala, 2019), which was based on (Lemaitre and Miguel-Aliaga, 2013). **b.** Schematic depiction of signaling from EECs. Solid arrows indicate that experimental data is available for function, and dashed arrows depict hypothetical functions. See text for details, and references. AKHn, AKH producing cells in CC; Lgr2, bursicon receptor; other acronyms in Table 1.

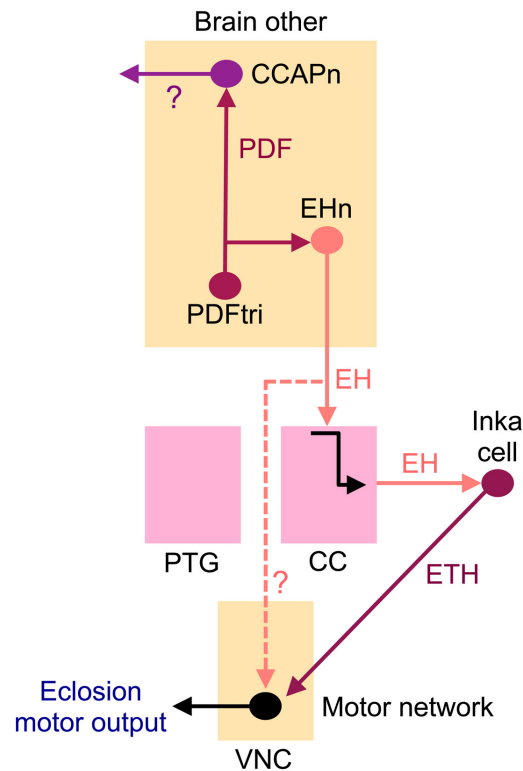

**S. Fig. 3.** *Pigment-dispersing hormone (PDF) in tritocerebral neurons (PDFtri).* A set of PDFtri neurons contact CCAP- (CCAPn) and EH producing (EHn) neurons and may be part of a circuit regulating adult eclosion via Inka cells and a motor network in the VNC (Selcho et al., 2018). This scheme is based on anatomy (GRASP technique) only and experimental data is required to verify the circuit.

## References

- Clements J, Dolafi T, Umayam L, Neubarth NL, Berg S, Scheffer LK, Plaza SM (2020) *neuPrint: Analysis Tools for EM Connectomics*. bioRxiv:2020.2001.2016.909465
- Clynen E, Schoofs L (2009) Peptidomic survey of the locust neuroendocrine system. *Insect Biochem Molec* 39:491-507
- Lemaitre B, Miguel-Aliaga I (2013) The Digestive Tract of *Drosophila melanogaster*. *Annual Review of Genetics*, Vol 47 47:377-404
- Liessem S, Ragionieri L, Neupert S, Büschges A, Predel R (2018) Transcriptomic and Neuropeptidomic Analysis of the Stick Insect, *Carausius morosus*. *J Proteome Res* 17:2192-2204
- Liu X, Ning X, Zhang Y, Chen W, Zhao Z, Zhang Q (2012) Peptidomic Analysis of the Brain and Corpora Cardiaca-Corpora Allata Complex in the *Bombyx mori*. *International journal of peptides* 2012:640359
- Nässel DR, Zandawala M (2019) Recent advances in neuropeptide signaling in *Drosophila*, from genes to physiology and behavior. *Progr Neurobiol* 179:101607
- Selcho M, Muhlbauer B, Hensgen R, Shiga S, Wegener C, Yasuyama K (2018) Anatomical characterization of PDF-tri neurons and peptidergic neurons associated with eclosion behavior in *Drosophila*. *J Comp Neurol* 526:1307-1328
- Xu CS, Januszewski M, Lu Z, Takemura S-y, Hayworth KJ, Huang G, Shinomiya K, Maitin-Shepard J, Ackerman D, Berg S, Blakely T, Bogovic J, Clements J, Dolafi

T, Hubbard P, Kainmueller D, Katz W, Kawase T, Khairy KA, Leavitt L, Li PH, Lindsey L, Neubarth N, Olbris DJ, Otsuna H, Troutman ET, Umayam L, Zhao T, Ito M, Goldammer J, Wolff T, Svirskas R, Schlegel P, Neace ER, Knecht CJ, Alvarado CX, Bailey DA, Ballinger S, Borycz JA, Canino BS, Cheatham N, Cook M, Dreher M, Duclos O, Eubanks B, Fairbanks K, Finley S, Forknall N, Francis A, Hopkins GP, Joyce EM, Kim S, Kirk NA, Kovalyak J, Lauchie SA, Lohff A, Maldonado C, Manley EA, McLin S, Mooney C, Ndama M, Ogundeyi O, Okeoma N, Ordish C, Padilla N, Patrick C, Paterson T, Phillips EE, Phillips EM, Rampally N, Ribeiro C, Robertson MK, Rymer JT, Ryan SM, Sammons M, Scott AK, Scott AL, Shinomiya A, Smith C, Smith K, Smith NL, Sobeski MA, Suleiman A, Swift J, Takemura S, Talebi I, Tarnogorska D, Tenshaw E, Tokhi T, Walsh JJ, Yang T, Horne JA, Li F, Parekh R, Rivlin PK, Jayaraman V, Ito K, Saalfeld S, George R, Meinertzhagen I, Rubin GM, Hess HF, Scheffer LK, Jain V, Plaza SM (2020) A Connectome of the Adult *Drosophila* Central Brain.

bioRxiv:2020.2001.2021.911859

Zheng Z, Lauritzen JS, Perlman E, Robinson CG, Nichols M, Milkie D, Torrens O, Price J, Fisher CB, Sharifi N, Calle-Schuler SA, Kmecova L, Ali IJ, Karsh B, Trautman ET, Bogovic JA, Hanslovsky P, Jefferis GSXE, Kazhdan M, Khairy K, Saalfeld S, Fetter RD, Bock DD (2018) A Complete Electron Microscopy Volume of the Brain of Adult *Drosophila melanogaster*. *Cell* 174:730-743.e722
